# Supplementary figures and images for: Genistein exhibits therapeutic potential for PCOS mice via the ER-Nrf2-Foxo1-ROS pathway
Source: Royal Society of Chemistry journal article supplement (doi:10.1039/d1fo00684c), 2021-01-01

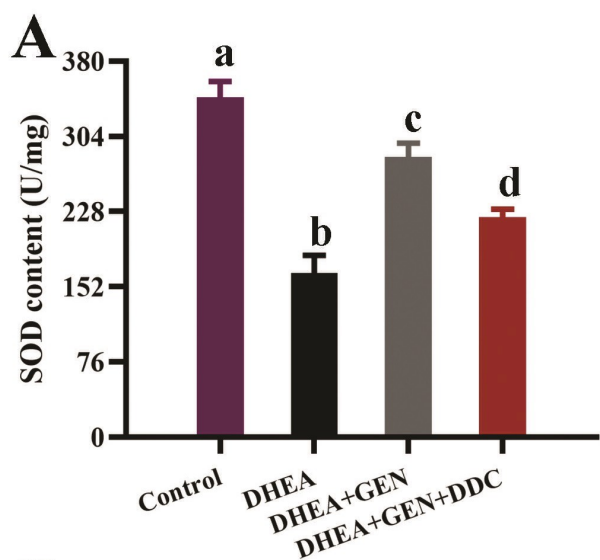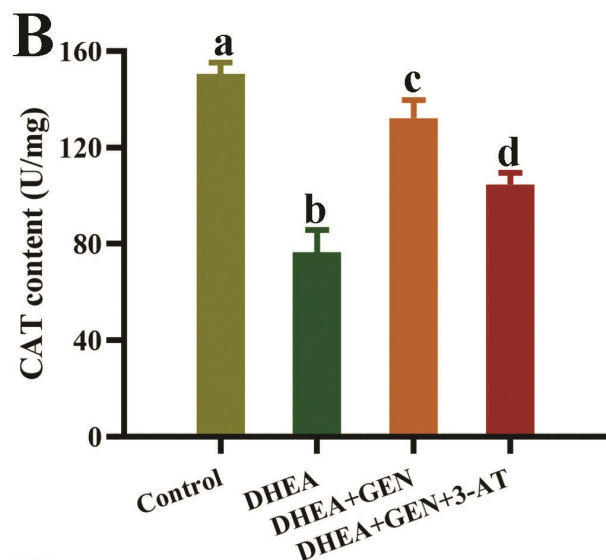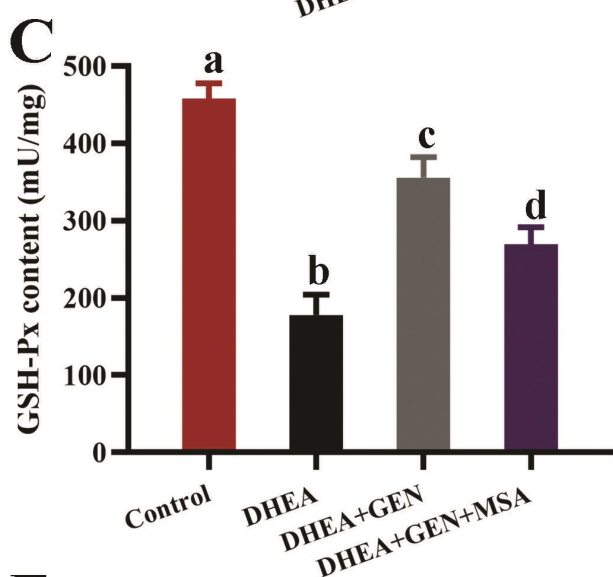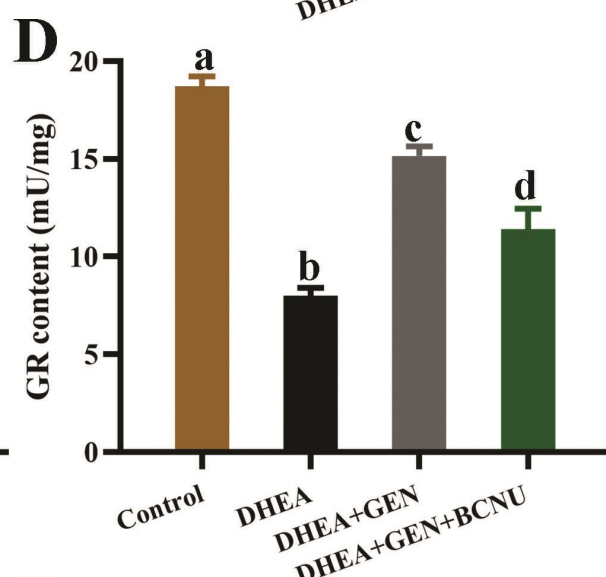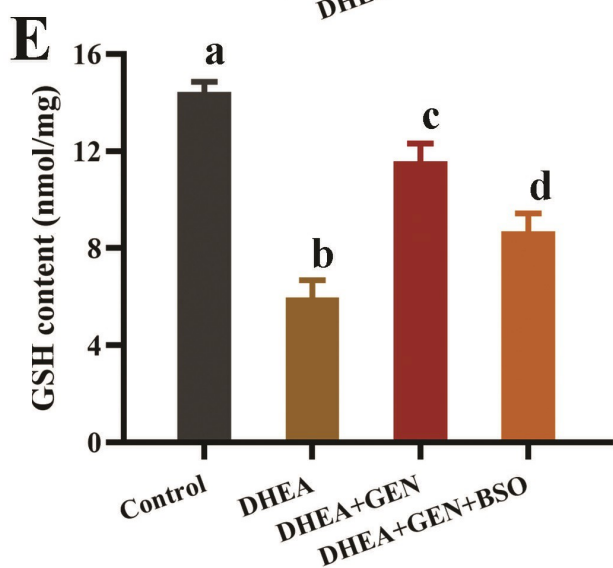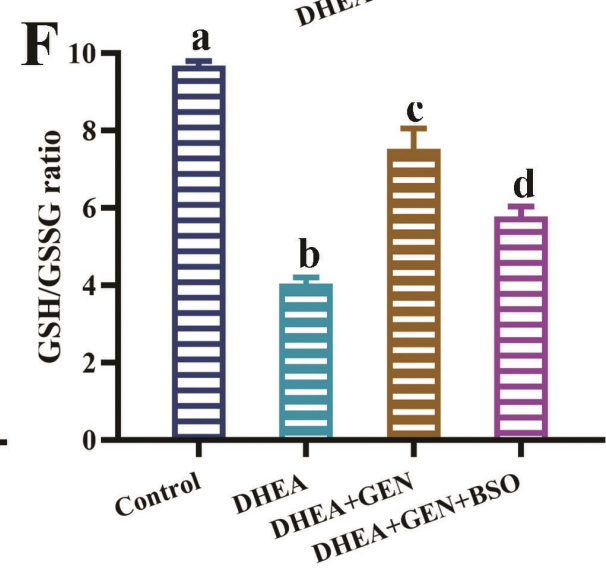

Supplement: d1fo00684c2.pdf [file d1fo00684c2.pdf]
